# Supplementary material for: Weighted gene coexpression network analysis strategies applied to mouse weight
Source: PubMed Central journal article supplement — Mamm Genome. 2007 Jul 1;18(6-7):463–72. doi: 10.1007/s00335-007-9043-3 (PMC1998880; doi:10.1007/s00335-007-9043-3), 2007-07-01
Supplement: 335_2007_9043_MOESM4_ESM.pdf [file 335_2007_9043_MOESM4_ESM.pdf]

|                 | Expression Data |        |        |        |        |        | kME   | kIN  | GS.trait | GS.SNP |
|-----------------|-----------------|--------|--------|--------|--------|--------|-------|------|----------|--------|
|                 | 1               | 2      | 3      | 4      | 5      | 6      |       |      |          |        |
| <b>Gene 1</b>   | 0.86            | 1.34   | 1.2    | -0.697 | -1.04  | -0.911 | 0.97  | 5.61 | 0.761    | 0.827  |
| <b>Gene 2</b>   | 1.06            | 1.12   | 1.25   | -1.03  | -1.08  | -1.19  | 0.992 | 6.29 | 0.727    | 0.808  |
| <b>Gene 3</b>   | -1.32           | -1.24  | -0.971 | 1.15   | 1.27   | 1.13   | 0.99  | 6.11 | 0.714    | 0.854  |
| <b>Gene 4</b>   | 1.71            | 0.0125 | 0.113  | -1.02  | -0.752 | -1.5   | 0.859 | 2.6  | 0.604    | 0.782  |
| <b>Gene 5</b>   | 1.16            | 1.56   | 1.31   | -1.69  | -1.34  | -0.286 | 0.911 | 3.88 | 0.508    | 0.683  |
| <b>Gene 6</b>   | -1.45           | -1.02  | -1.03  | 0.773  | 0.614  | 2.08   | 0.955 | 4.93 | 0.76     | 0.838  |
| <b>Gene 7</b>   | 1.29            | 0.99   | 0.908  | -1.23  | -0.785 | -1.22  | 0.996 | 6.27 | 0.646    | 0.804  |
| <b>Gene 8</b>   | 1.47            | 1.6    | 0.0726 | -1.04  | -0.515 | -1.66  | 0.914 | 3.7  | 0.627    | 0.883  |
| <b>Gene 9</b>   | -0.615          | -0.451 | -1.32  | 1.74   | 0.925  | 1.38   | 0.945 | 4.67 | 0.549    | 0.61   |
| <b>Gene 10</b>  | 0.785           | 1.42   | 1.29   | -0.462 | -0.379 | -1.1   | 0.958 | 5.13 | 0.74     | 0.787  |
| <b>trait</b>    | 1               | 1      | 1      | 1      | 2      | 2      |       |      |          |        |
| <b>SNP</b>      | 2               | 2      | 1      | 1      | 0      | 0      |       |      |          |        |
| <b>genotype</b> | AA              | AA     | AB     | AB     | BB     | BB     |       |      |          |        |
| <b>ME</b>       | 0.44            | 0.41   | 0.366  | -0.408 | -0.331 | -0.477 |       |      |          |        |

**Supplementary Table 1:** Gene expression data, kME, kIN, GS.trait, GS.SNP, trait, SNP, genotype and ME values.
