# Supplementary material for: Weighted gene coexpression network analysis strategies applied to mouse weight
Source: PubMed Central journal article supplement — Mamm Genome. 2007 Jul 1;18(6-7):463–72. doi: 10.1007/s00335-007-9043-3 (PMC1998880; doi:10.1007/s00335-007-9043-3), 2007-07-01
Supplement: 335_2007_9043_MOESM5_ESM.pdf [file 335_2007_9043_MOESM5_ESM.pdf]

|                 | <b>Marker Coding</b> |                 |                  |
|-----------------|----------------------|-----------------|------------------|
| <b>Genotype</b> | <b>Additive</b>      | <b>Dominant</b> | <b>Recessive</b> |
| <b>AA</b>       | 2                    | 1               | 1                |
| <b>AB</b>       | 1                    | 1               | 0                |
| <b>BB</b>       | 0                    | 0               | 0                |

**Supplementary Table 2:** Depiction of different marker coding schema. Additive marker coding counts the number of A alleles in the genotype. Dominant marker coding indicates the presence of an A allele, and recessive marker coding indicates the presence of two A alleles.
