# Supplementary material for: Weighted gene coexpression network analysis strategies applied to mouse weight
Source: PubMed Central journal article supplement — Mamm Genome. 2007 Jul 1;18(6-7):463–72. doi: 10.1007/s00335-007-9043-3 (PMC1998880; doi:10.1007/s00335-007-9043-3), 2007-07-01
Supplement: 335_2007_9043_MOESM12_ESM.pdf [file 335_2007_9043_MOESM12_ESM.pdf]

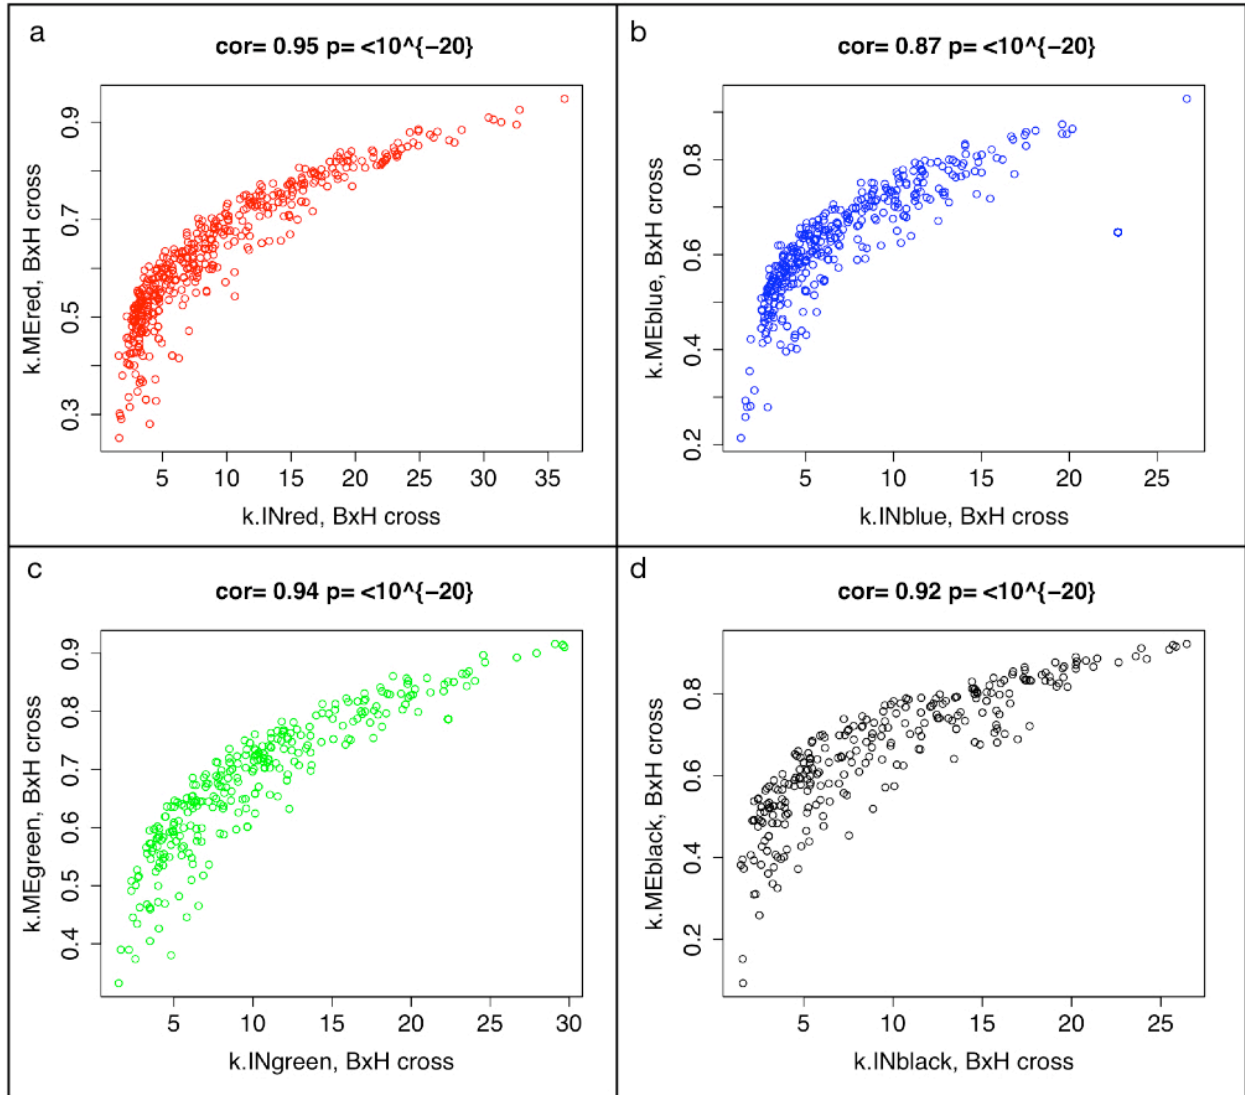

**Supplementary Fig. 1:** Scatterplots of kIN (intramodular connectivity) and kME (module eigengene-based connectivity) in the four largest modules of the BxH data: a) Red module (437 genes), b) Blue module (370 genes), c) Green module (299 genes), d) Black module (264 genes). Spearman correlations are reported above each plot.
