# Supplementary material for: Weighted gene coexpression network analysis strategies applied to mouse weight
Source: PubMed Central journal article supplement — Mamm Genome. 2007 Jul 1;18(6-7):463–72. doi: 10.1007/s00335-007-9043-3 (PMC1998880; doi:10.1007/s00335-007-9043-3), 2007-07-01
Supplement: 335_2007_9043_MOESM13_ESM.pdf [file 335_2007_9043_MOESM13_ESM.pdf]

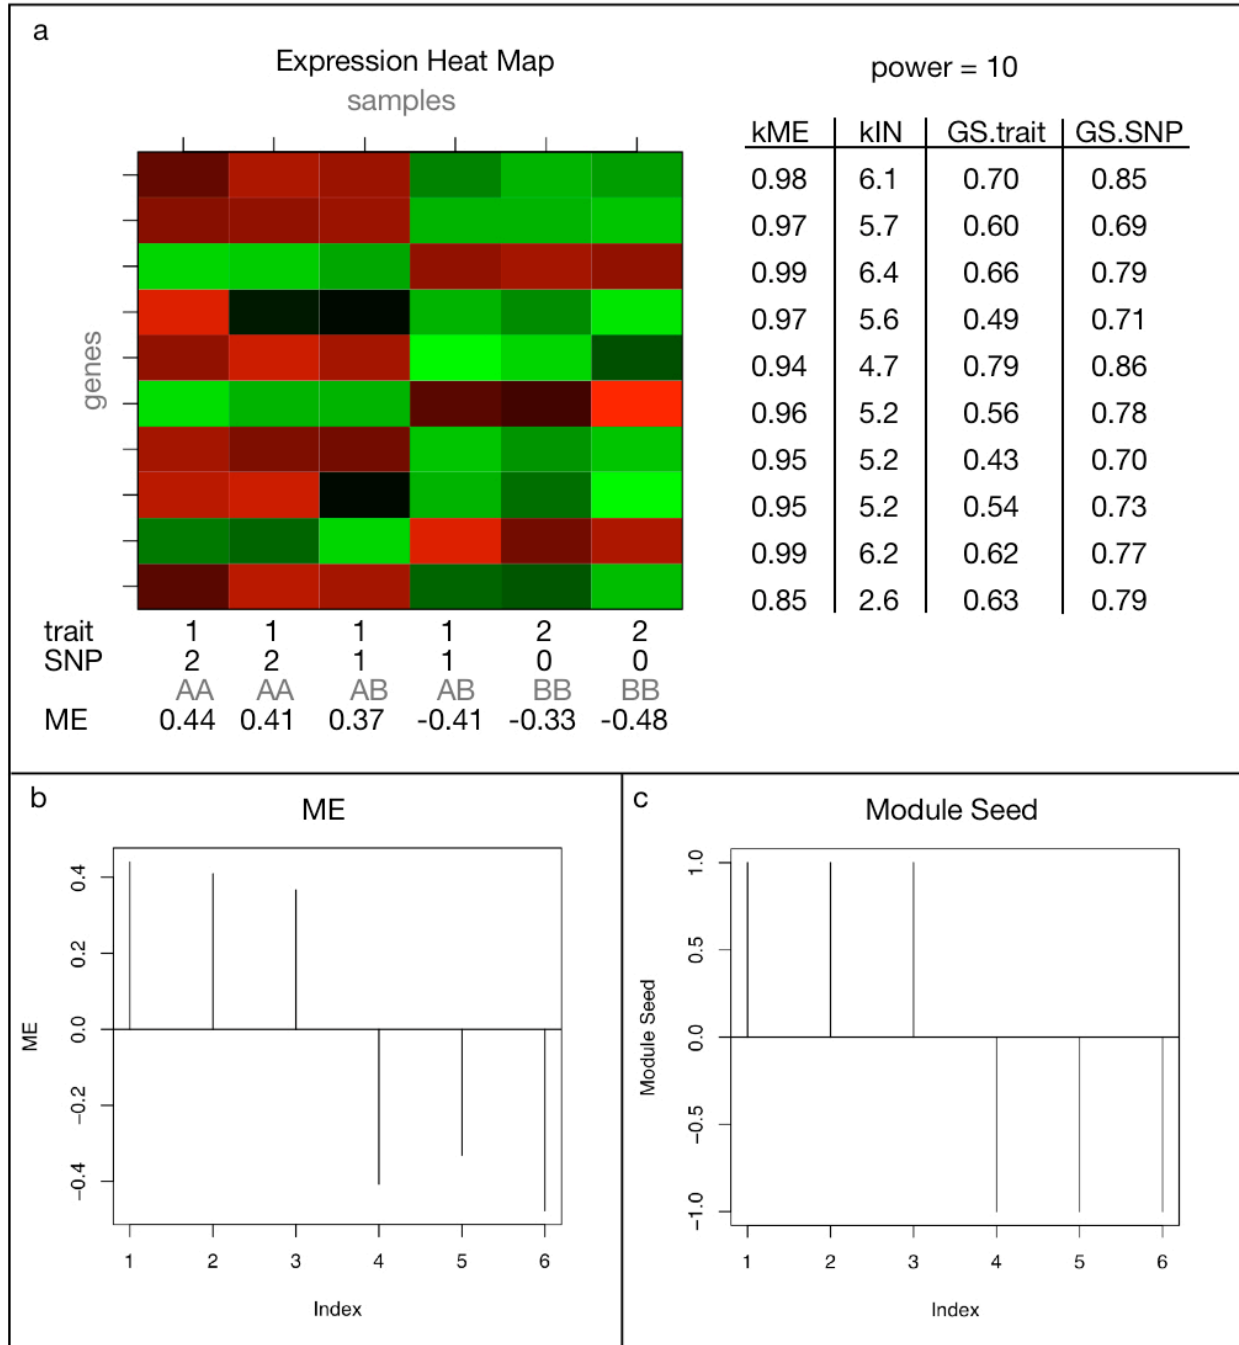

**Supplementary Fig. 2:** a) Expression heat map of a simulated module containing 6 arrays and 10 genes. kME, kIN, GS.trait (gene significance measure for the trait), and GS.SNP values for corresponding genes are shown to the right. Trait, SNP and ME values are shown at the bottom, with additive marker coding depicted for each of the simulated genotypes. Genes with high

similarity to the module eigengene have higher connectivity. b) Module eigengenes calculated from the simulated module. c) Module seed values for each of the 6 arrays.
