# Supplementary material for: Weighted gene coexpression network analysis strategies applied to mouse weight
Source: PubMed Central journal article supplement — Mamm Genome. 2007 Jul 1;18(6-7):463–72. doi: 10.1007/s00335-007-9043-3 (PMC1998880; doi:10.1007/s00335-007-9043-3), 2007-07-01
Supplement: 335_2007_9043_MOESM14_ESM.pdf [file 335_2007_9043_MOESM14_ESM.pdf]

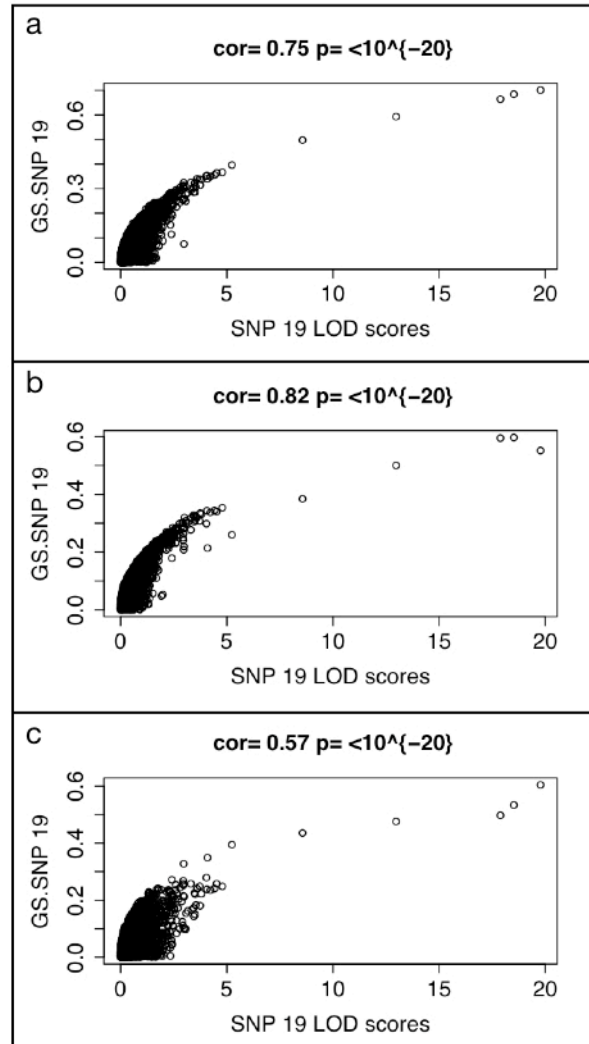

**Supplementary Fig. 3:** Scatterplots of GS.SNP versus LOD score with respect to marker p45229 (rs3658160) on the 19<sup>th</sup> chromosome. The Spearman correlations are shown for different marker coding schema: a) Additive marker coding, b) Dominant marker coding, c) Recessive marker coding. The marker coding methods displayed above are explained in Suppl. Table 2.
